# Supplementary figures and images for: A detailed investigation of the core@shell structure of exchanged coupled magnetic nanoparticles after performing solvent annealing
Source: Royal Society of Chemistry journal article supplement (doi:10.1039/d2ma00629d), 2022-01-01

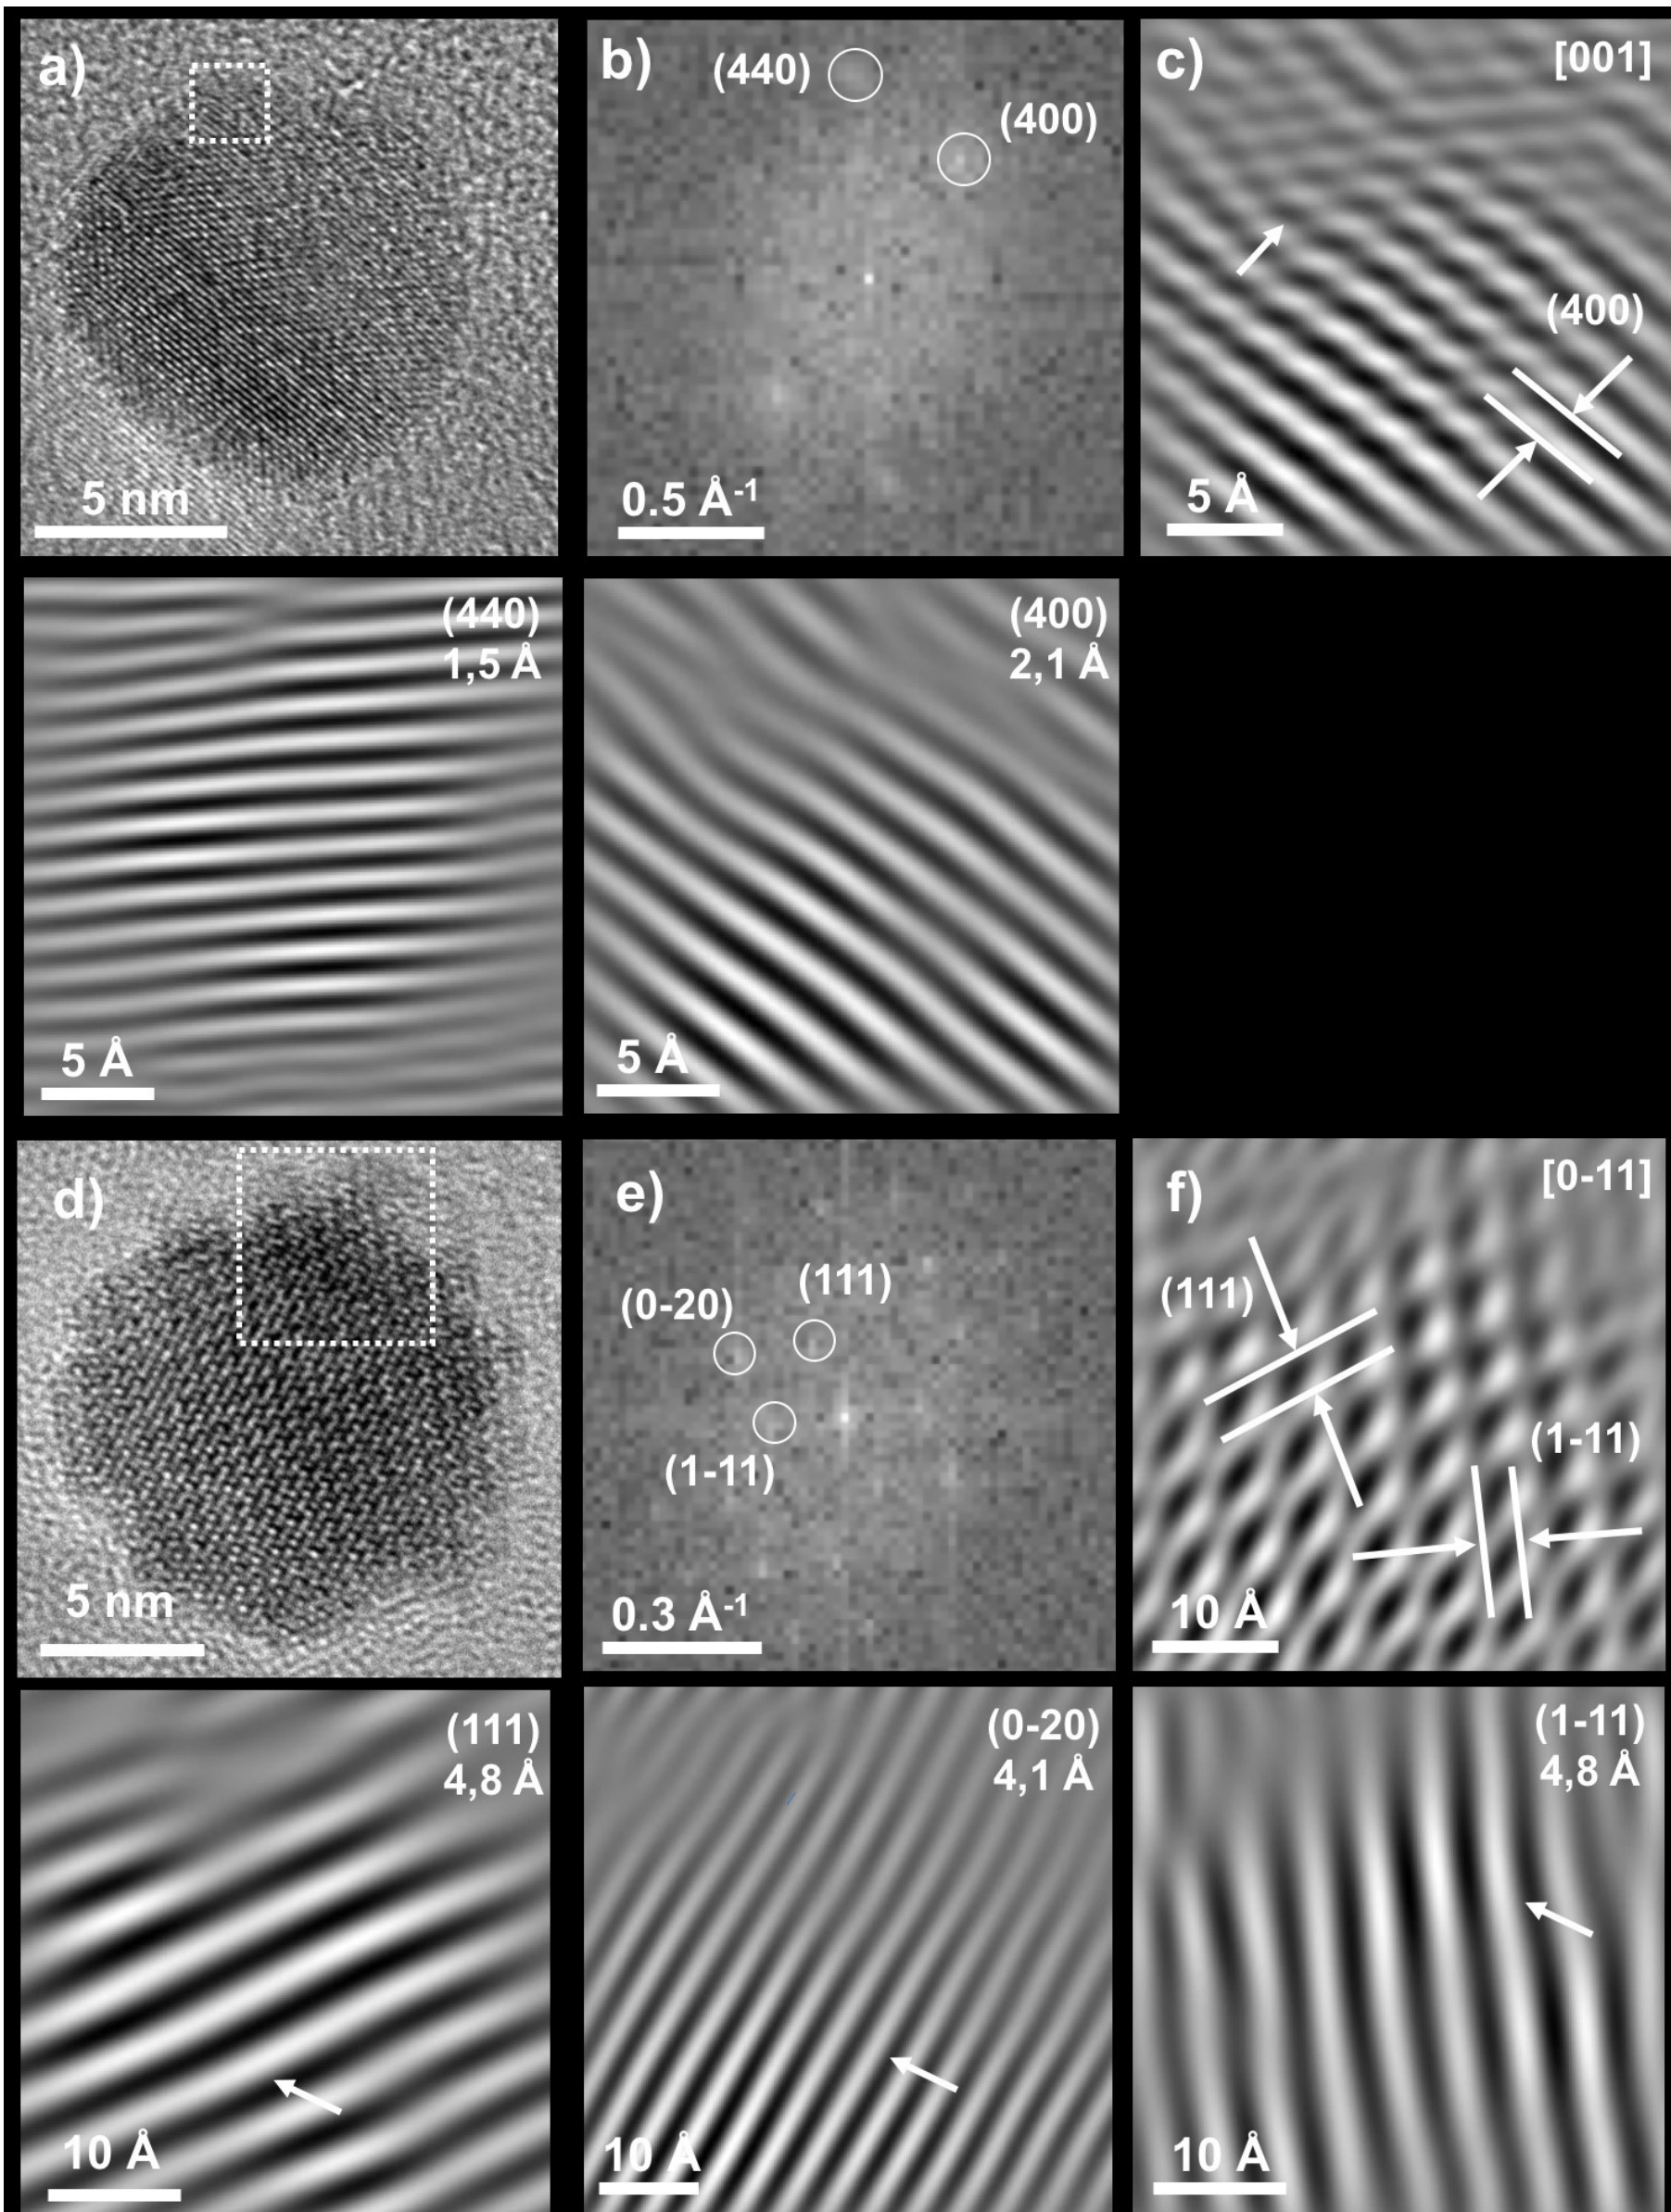

Supplement: d2ma00629d2.pdf [file d2ma00629d2.pdf]
